# Supplementary material for: Tongue Coating and the Salivary Microbial Communities Vary in Children with Halitosis
Source: PubMed Central journal article supplement (PMC4832241; doi:10.1038/srep24481), 2016-04-15
Supplement: srep24481-s1.pdf [file srep24481-s1.pdf]

## **Tongue Coating and the Salivary Microbial Communities Vary in Children with Halitosis**

Wen Ren<sup>1,#</sup>, Zhe Xun<sup>1,#</sup>, Zicheng Wang<sup>2</sup>, Qun Zhang<sup>1</sup>, Xuenan Liu<sup>1</sup>, Hui Zheng<sup>3</sup>, Qian Zhang<sup>3</sup>, Yifei Zhang<sup>3</sup>, Linshuang Zhang<sup>4</sup>, Chunyan Wu<sup>4</sup>, Shuguo Zheng<sup>1</sup>, Nan Qin<sup>5</sup>, S. Dusko Ehrlich<sup>6,7</sup>, Yihong Li<sup>8</sup>, Xuesong He<sup>9</sup>, Tao Xu<sup>1,\*</sup>, Ting Chen<sup>2,10,\*</sup>, Feng Chen<sup>3,\*</sup>

# These authors contributed equally to this work.

<sup>1</sup> Department of Preventive Dentistry, Peking University School and Hospital of Stomatology, Beijing, China, <sup>2</sup> Bioinformatics Division, TNLIST and Department of Automation, Tsinghua University, Beijing, China, <sup>3</sup> Central Laboratory, Peking University School and Hospital of Stomatology, Beijing, China, <sup>4</sup> Realbio Genomics Institute, Shanghai, China, <sup>5</sup> State Key Laboratory for Diagnosis and Treatment of Infectious Disease, The First Affiliated Hospital, College of Medicine, Zhejiang University, Hangzhou, China, <sup>6</sup> Metagenopolis, Institut National de la Recherche Agronomique, Jouy en Josas, France, <sup>7</sup> King's College London, Centre for Host-Microbiome Interactions, Dental Institute Central Office, Guy's Hospital, London Bridge, London, UK, <sup>8</sup> Department of Basic Science and Craniofacial Biology, New York University College of Dentistry, New York, USA, <sup>9</sup> School of Dentistry, University of California Los Angeles, Los Angeles, CA, USA, <sup>10</sup> Programs in Computational Biology and Bioinformatics, University of Southern California, Los Angeles, USA.

\* Corresponding authors:

Feng Chen: 22# Zhongguancun Nandajie, Haidian District, Beijing 100081, China. Tel: +86-010-82195773. Email: [moleculcef@gmail.com](mailto:moleculcef@gmail.com);

Ting Chen: FIT 1-107, Tsinghua University, Beijing, 100084, China. Tel: +86-010-62797101. Email: [tingchen@mail.tsinghua.edu.cn](mailto:tingchen@mail.tsinghua.edu.cn);

Tao Xu: 22# Zhongguancun Nandajie, Haidian District, Beijing 100081, China. Tel: +86-010-82195269. Email: [taoxu@bjmu.edu.cn](mailto:taoxu@bjmu.edu.cn).

## Supplementary Figures

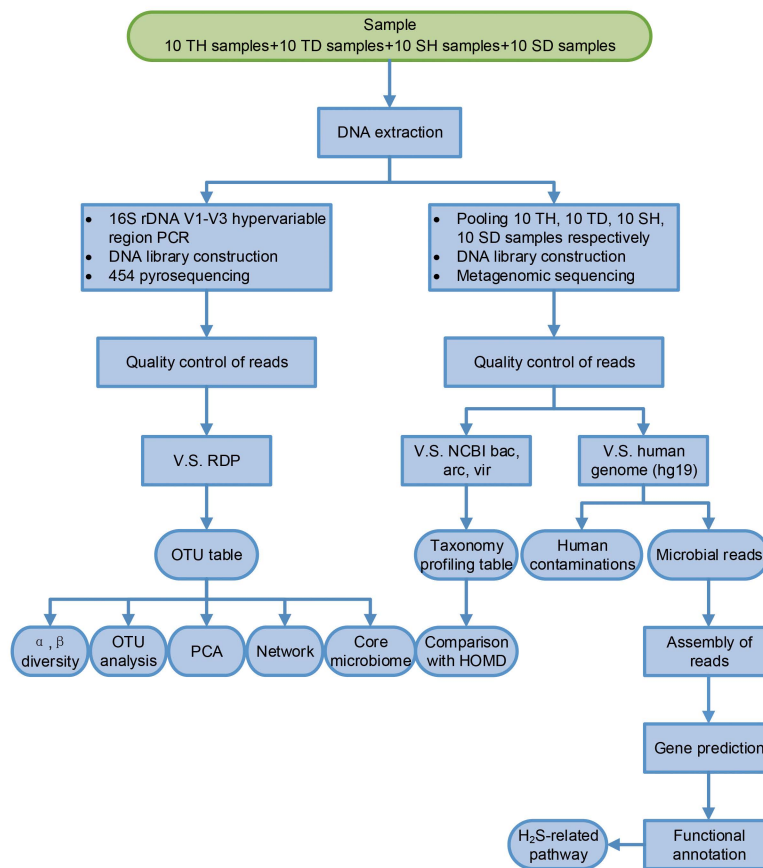

**Figure S1. Experimental process.** TH: healthy tongue coating sample, TD: tongue coating sample with halitosis, SH: healthy saliva sample, SD: saliva sample with halitosis.

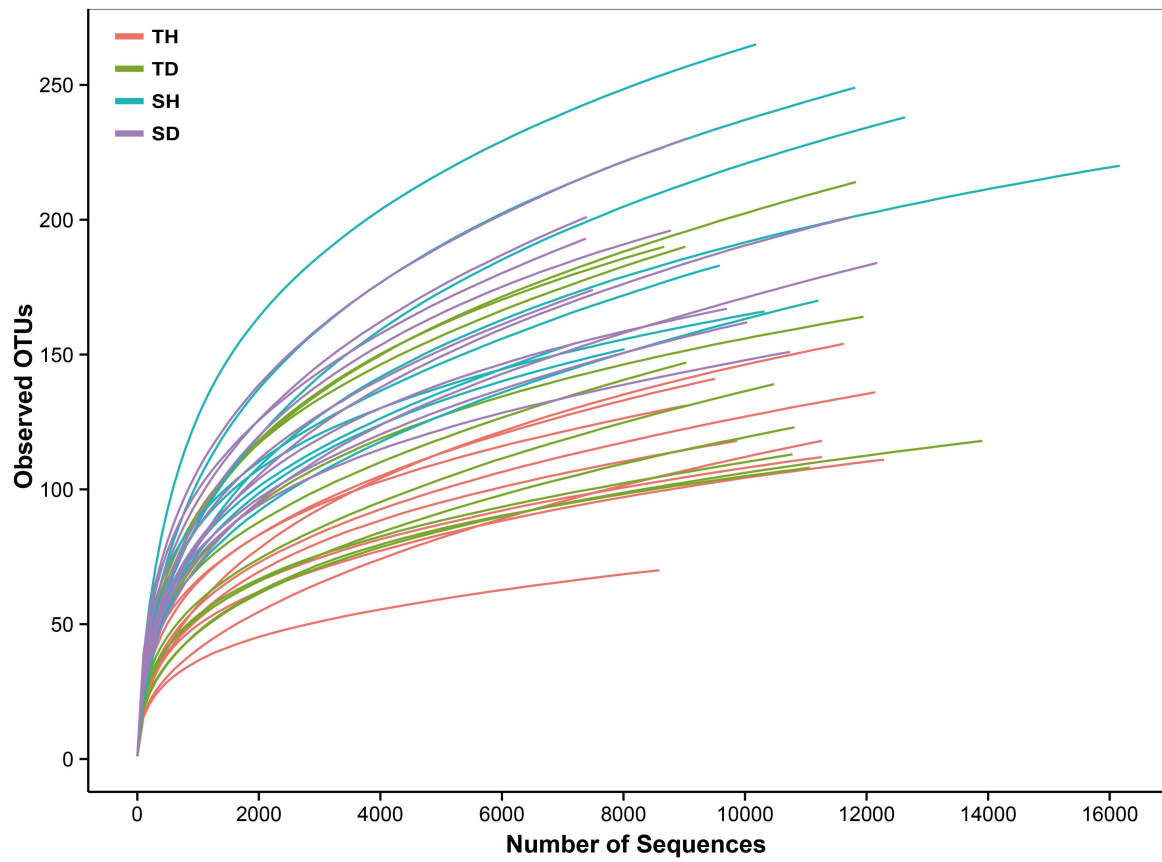

**Figure S2. Rarefaction curves of 38 samples.** Every 100 sequences were randomly sampled in each dataset. Most curves become flat in the end indicating that a reasonable number of tags were analyzed.

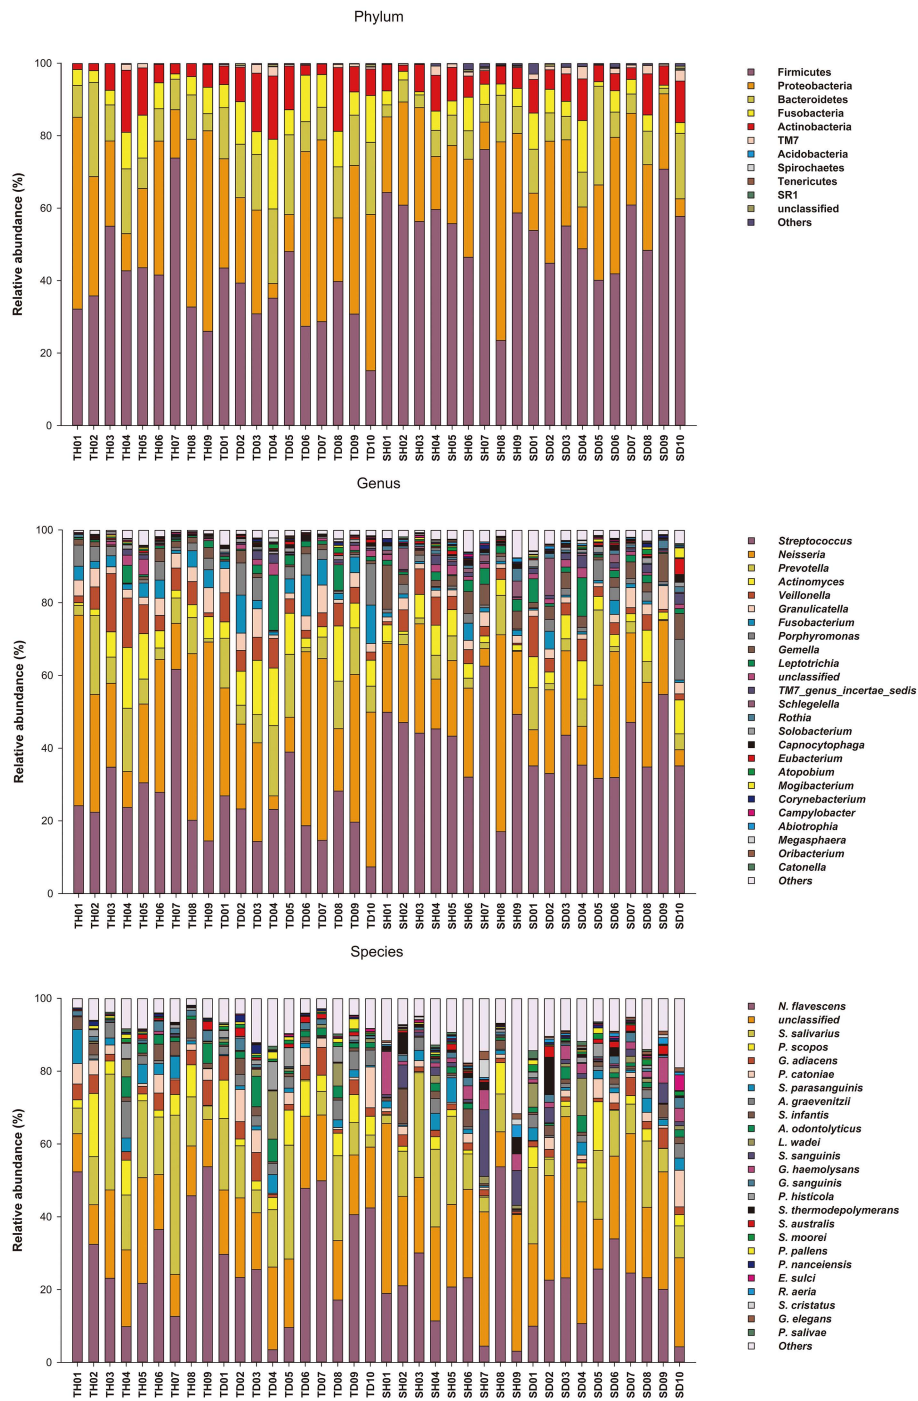

**Figure S3.** Community composition of each sample at phylum, genus and species level. All the phyla, the predominant 25 genera and species are shown. Label on x-axis represents sample ID.

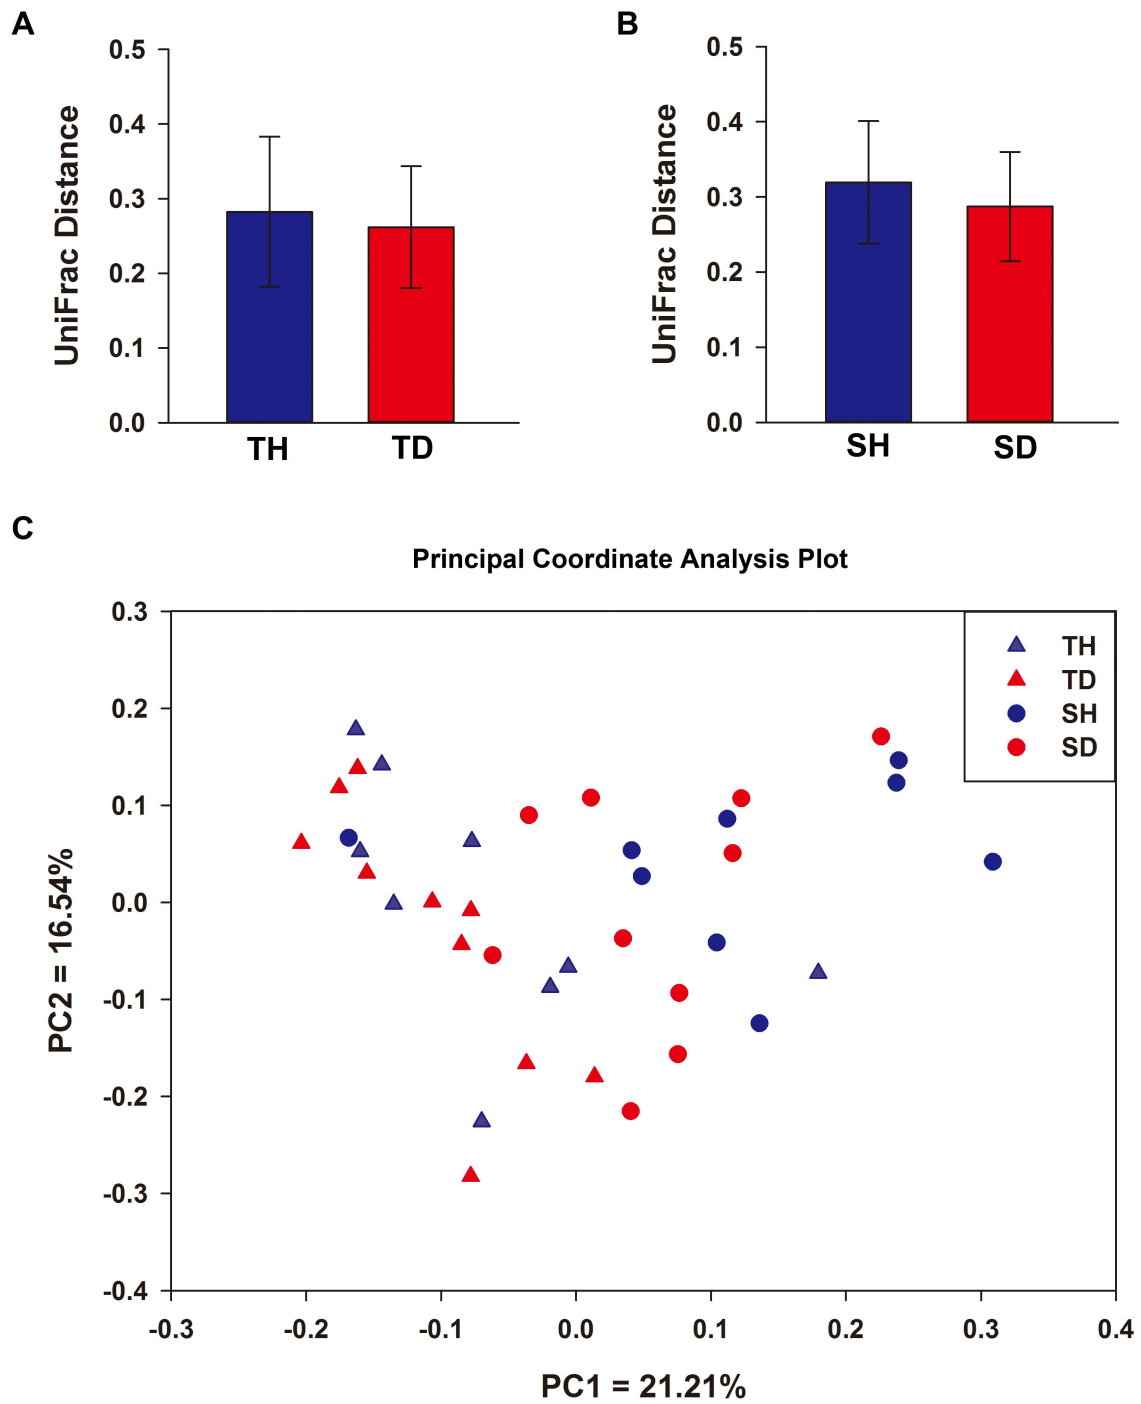

Figure S4. Comparisons of  $\beta$  diversity calculated using weighted UniFrac distance.

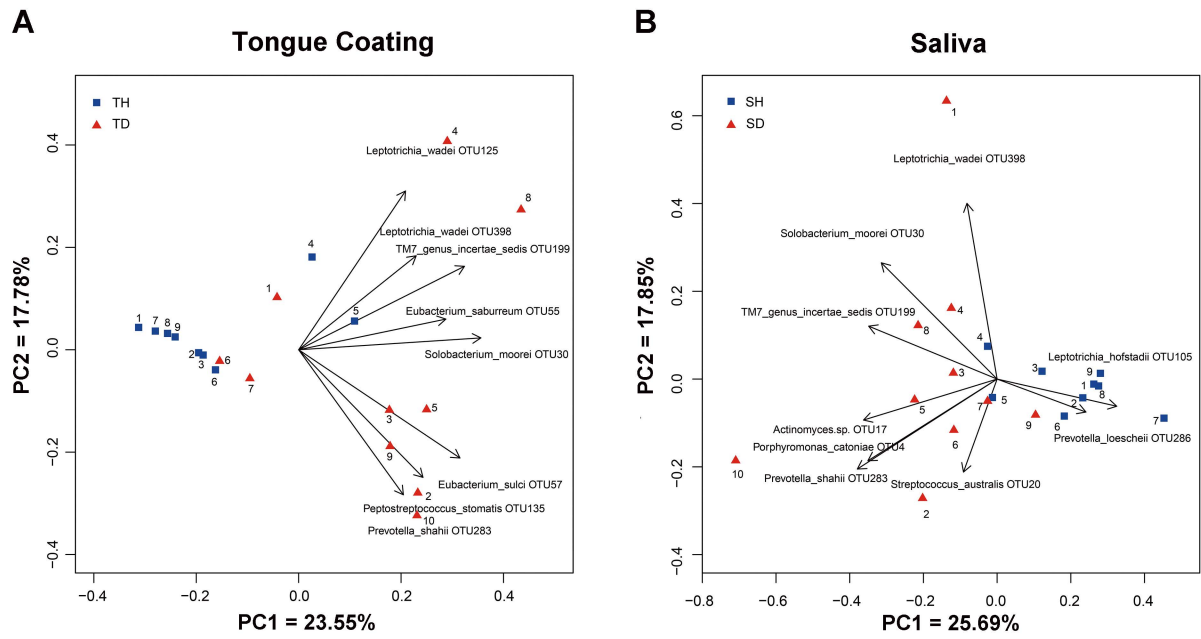

**Figure S5. Results of principal component analysis (PCA).** PCA plots were generated using OTUs with different relative abundances (A) between TH and TD, (B) between SH and SD.

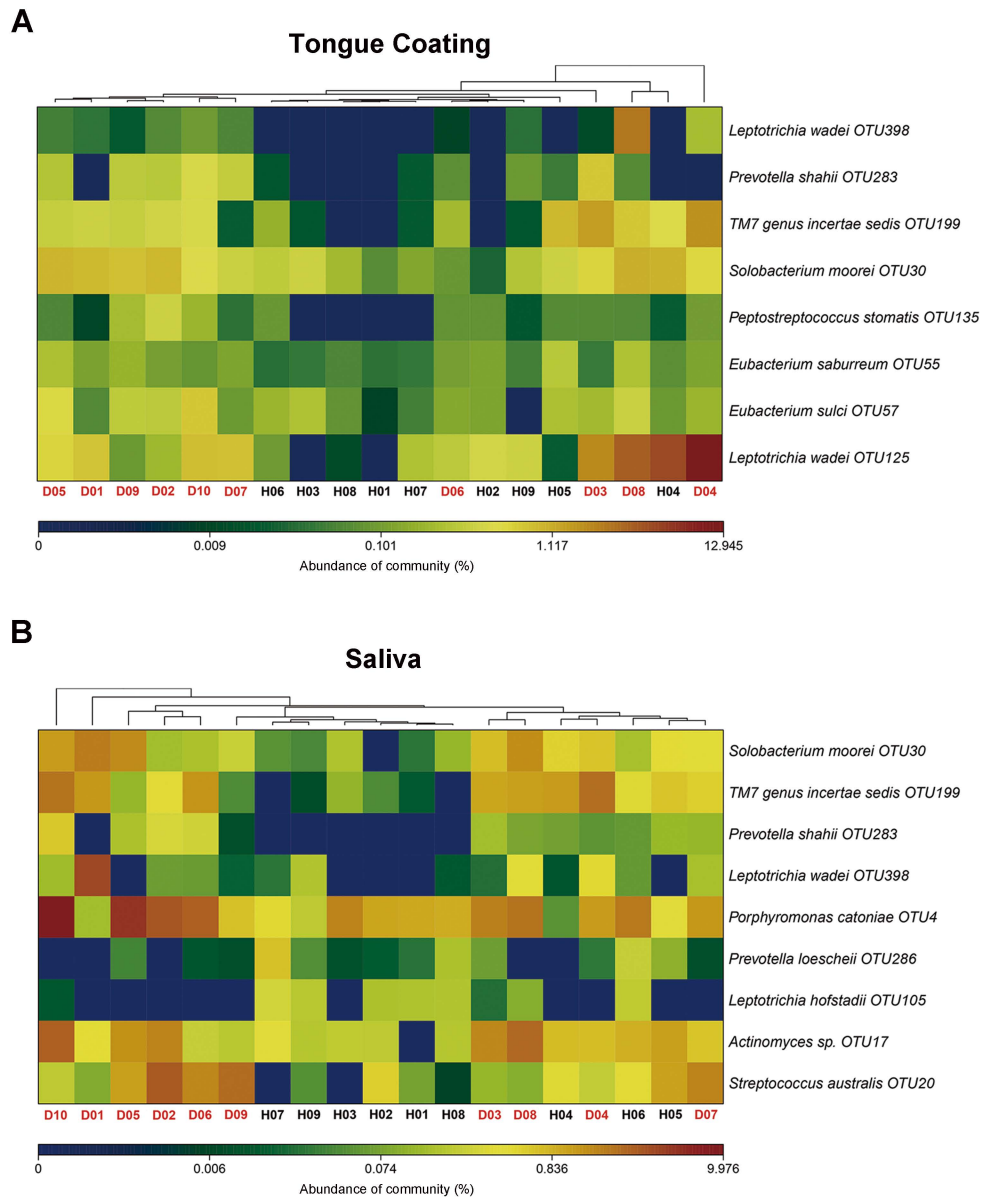

**Figure S6. Heatmaps of OTUs with different relative abundances per subject in tongue coating (A) and saliva (B).** Samples were clustered based on Manhattan distance. Samples labeled in black represent healthy ones, while samples labeled in red represent halitosis ones. Individual cells of each OTU are color-coded according to relative abundance, with an increasing value from blue to red.

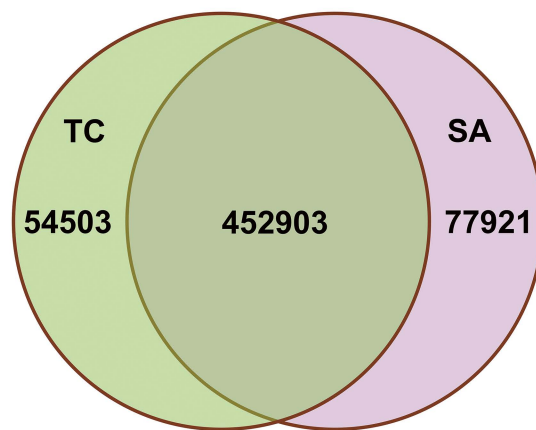

**Figure S7. Comparison of oral microbiome gene sets between tongue coating (TC) and saliva samples (SA).** Venn diagram of gene sets of tongue coating and saliva samples. The gene number in each group and the overlapping area are shown.





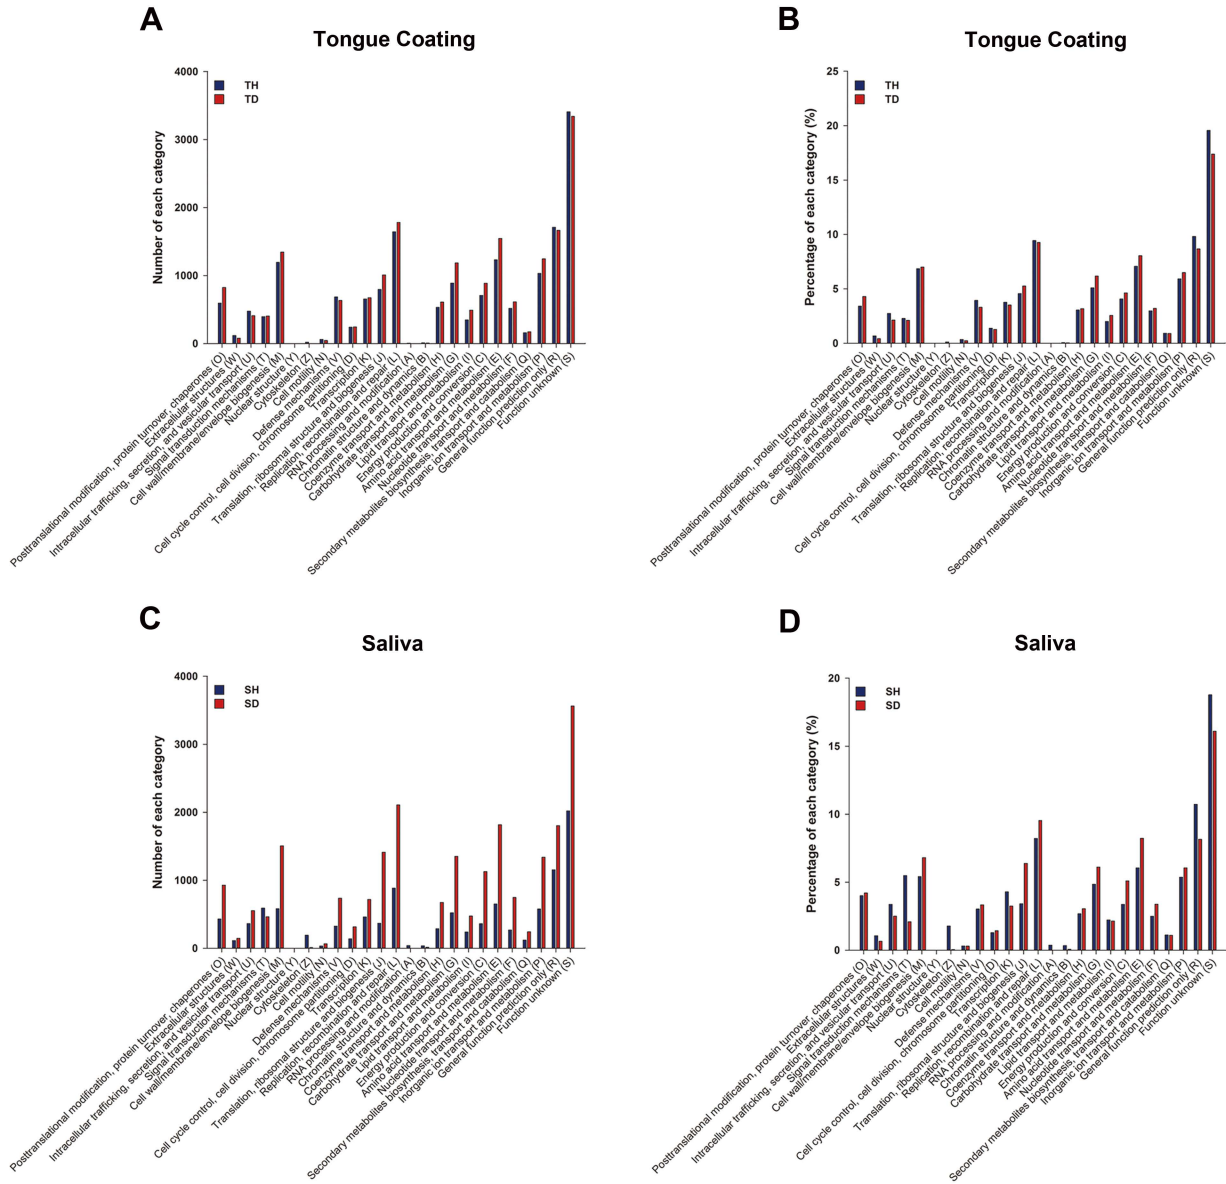

**Figure S9. The distribution of eggNOG orthologous groups for differential genes.** (A) Comparison between the healthy tongue coating (TH) and halitosis tongue coating (TD) differential genes in eggNOG orthologous groups is shown by number. (B) Comparison between the healthy tongue coating (TH) and halitosis tongue coating (TD) differential genes in eggNOG orthologous groups is shown by percentage. (C) Comparison between the healthy saliva (SH) and halitosis saliva (SD) differential genes in eggNOG orthologous groups is shown by number. (D) Comparison between the healthy saliva (SH) and halitosis saliva (SD) differential genes in eggNOG orthologous groups is shown by percentage.

## Supplementary Tables

**Table S1-1 Basic details of the 20 evaluated subjects**

| Characteristics                                                  | Health (n=9 <sup>c</sup> ) | Halitosis (n=10) |
|------------------------------------------------------------------|----------------------------|------------------|
| Female (%)                                                       | 55.56                      | 80               |
| H <sub>2</sub> S <sup>a</sup> (mean $\pm$ s.d.)                  | 0.01 $\pm$ 0.02            | 4.58 $\pm$ 2.37  |
| CH <sub>3</sub> SH <sup>a</sup> (mean $\pm$ s.d.)                | 0                          | 1.81 $\pm$ 4.84  |
| (CH <sub>3</sub> ) <sub>2</sub> S <sup>a</sup> (mean $\pm$ s.d.) | 0                          | 1.96 $\pm$ 5.18  |
| dmft <sup>b</sup> (mean $\pm$ s.d.)                              | 2.33 $\pm$ 3.04            | 1.80 $\pm$ 1.81  |
| Caries prevalence (%)                                            | 0.5556                     | 0.6              |

<sup>a</sup> P < 0.05 (Wilcoxon rank-sum test). H<sub>2</sub>S, CH<sub>3</sub>SH, (CH<sub>3</sub>)<sub>2</sub>S were measured by ng 10ml<sup>-1</sup>.

<sup>b</sup> decayed-missing-filled teeth.

<sup>c</sup> One healthy subject was excluded because the number of reads of his tongue coating sample were too poor by *16S rRNA* gene pyrosequencing.

**Table S1-2 Basic details of the 20 evaluated subjects**

| ID      | Gender (M/F) | Age (years) | H <sub>2</sub> S (ng/ml) | CH <sub>3</sub> SH (ng/ml) | (CH <sub>3</sub> ) <sub>2</sub> S (ng/ml) | dmft* | dt* | TCA* | TCT* | GI*  | DI-S* | Saliva pH | Systemic Diseases (Y/N) |
|---------|--------------|-------------|--------------------------|----------------------------|-------------------------------------------|-------|-----|------|------|------|-------|-----------|-------------------------|
| HC**01  | F            | 4           | 0                        | 0                          | 0                                         | 0     | 0   | 1    | 1    | 1.14 | 8     | 7.4       | N                       |
| HC02    | M            | 4           | 0                        | 0                          | 0                                         | 9     | 5   | 2    | 2    | 1    | 5     | 7         | N                       |
| HC03    | F            | 4           | 0                        | 0                          | 0                                         | 0     | 0   | 2    | 2    | 1.06 | 7     | 6.8       | N                       |
| HC04    | F            | 4           | 0                        | 0                          | 0                                         | 2     | 2   | 2    | 2    | 1.06 | 10    | 6.9       | N                       |
| HC05    | M            | 4           | 0                        | 0                          | 0                                         | 3     | 3   | 2    | 2    | 1.11 | 10    | 7.1       | N                       |
| HC06    | F            | 4           | 0                        | 0                          | 0                                         | 2     | 2   | 2    | 1    | 1.11 | 8     | 6.9       | N                       |
| HC07    | M            | 4           | 0                        | 0                          | 0                                         | 5     | 0   | 1    | 1    | 1.06 | 13    | 6.7       | N                       |
| HC08    | F            | 4           | 0.02                     | 0                          | 0                                         | 0     | 3   | 1    | 1    | 1    | 7     | 7.1       | N                       |
| HC09    | M            | 4           | 0.05                     | 0                          | 0                                         | 0     | 0   | 1    | 1    | 1.08 | 13    | 7.1       | N                       |
| HC10    | F            | 4           | 0                        | 0                          | 0                                         | 2     | 0   | 2    | 2    | 1    | 6     | 7.1       | N                       |
| DIS**01 | F            | 4           | 1.58                     | 0.49                       | 1.54                                      | 0     | 0   | 1    | 1    | 1.08 | 9     | 7.4       | N                       |
| DIS02   | F            | 4           | 1.64                     | 15.55                      | 16.62                                     | 0     | 0   | 2    | 1    | 1.03 | 8     | 6.9       | N                       |
| DIS03   | F            | 5           | 1.85                     | 0.24                       | 1.14                                      | 3     | 4   | 2    | 2    | 1.08 | 5     | 7         | N                       |
| DIS04   | F            | 4           | 3.24                     | 1.15                       | 0                                         | 3     | 3   | 2    | 2    | 1.06 | 11    | 6.9       | N                       |
| DIS05   | M            | 4           | 5.97                     | 0.56                       | 0.31                                      | 3     | 3   | 1    | 2    | 1    | 5     | 7.3       | N                       |
| DIS06   | F            | 4           | 6.03                     | 0.11                       | 0                                         | 0     | 0   | 2    | 1    | 1.08 | 5     | 7         | N                       |
| DIS07   | F            | 4           | 6.15                     | 0                          | 0                                         | 5     | 2   | 2    | 1    | 1    | 7     | 7.4       | N                       |
| DIS08   | F            | 4           | 7.49                     | 0.03                       | 0                                         | 3     | 2   | 2    | 2    | 1.22 | 8     | 7         | N                       |
| DIS09   | M            | 4           | 7.5                      | 0                          | 0                                         | 0     | 0   | 2    | 1    | 1.19 | 11    | 7.2       | N                       |
| DIS10   | F            | 5           | 4.34                     | 0                          | 0                                         | 1     | 0   | 1    | 1    | 1.17 | 8     | 7.1       | N                       |

## \*Abbreviations:

dmft, decayed, missing, filled teeth;

dt, decayed teeth

TCA, Tongue Coating Area;

TCT, Tongue Coating Thickness;

GI, Gingival Index;

DI-S, Debris Index-Simplified.

Criteria were based on Jinyou Bian. in *Preventive Dentistry* (Beijing, 2006).

\*\*HC: healthy samples;

DIS: halitosis samples.

**Table S2 Background information and pyrosequencing data of 40 samples**

| ID    | Site           | Diagnosis | Raw tag number | Final tag number |
|-------|----------------|-----------|----------------|------------------|
| TH*01 | Tongue coating | Healthy   | 24,214         | 11,266           |
| TH02  | Tongue coating | Healthy   | 28,722         | 11,266           |
| TH03  | Tongue coating | Healthy   | 28,918         | 12,284           |
| TH04  | Tongue coating | Healthy   | 28,779         | 9,504            |
| TH05  | Tongue coating | Healthy   | 27,315         | 9,015            |
| TH06  | Tongue coating | Healthy   | 31,935         | 12,144           |
| TH07  | Tongue coating | Healthy   | 27,240         | 9,873            |
| TH08  | Tongue coating | Healthy   | 19,193         | 8,589            |
| TH09  | Tongue coating | Healthy   | 24,610         | 11,626           |
| TH10  | Tongue coating | Healthy   | 13,843         | 4,780            |
| TD*01 | Tongue coating | Halitosis | 27,128         | 10,782           |
| TD02  | Tongue coating | Halitosis | 28,779         | 10,814           |
| TD03  | Tongue coating | Halitosis | 27,032         | 9,017            |
| TD04  | Tongue coating | Halitosis | 27,416         | 8,670            |
| TD05  | Tongue coating | Halitosis | 31,572         | 11,825           |
| TD06  | Tongue coating | Halitosis | 23,721         | 11,061           |
| TD07  | Tongue coating | Halitosis | 29,612         | 13,904           |
| TD08  | Tongue coating | Halitosis | 28,295         | 9,034            |
| TD09  | Tongue coating | Halitosis | 23,201         | 10,476           |
| TD10  | Tongue coating | Halitosis | 26,779         | 11,949           |
| SH*01 | Saliva         | Healthy   | 23,092         | 8,019            |
| SH02  | Saliva         | Healthy   | 30,502         | 7,180            |
| SH03  | Saliva         | Healthy   | 28,147         | 11,205           |
| SH04  | Saliva         | Healthy   | 28,318         | 9,583            |
| SH05  | Saliva         | Healthy   | 30,057         | 10,320           |
| SH06  | Saliva         | Healthy   | 32,325         | 10,182           |
| SH07  | Saliva         | Healthy   | 39,244         | 11,814           |
| SH08  | Saliva         | Healthy   | 36,669         | 16,167           |
| SH09  | Saliva         | Healthy   | 34,904         | 12,633           |
| SH10  | Saliva         | Healthy   | 30,838         | 10,661           |
| SD*01 | Saliva         | Halitosis | 30,691         | 10,037           |
| SD02  | Saliva         | Halitosis | 30,235         | 7,496            |
| SD03  | Saliva         | Halitosis | 25,292         | 8,782            |
| SD04  | Saliva         | Halitosis | 21,941         | 7,396            |
| SD05  | Saliva         | Halitosis | 29,706         | 10,741           |
| SD06  | Saliva         | Halitosis | 25,994         | 9,705            |
| SD07  | Saliva         | Halitosis | 33,605         | 12,175           |
| SD08  | Saliva         | Halitosis | 23,299         | 7,381            |
| SD09  | Saliva         | Halitosis | 33,545         | 11,755           |
| SD10  | Saliva         | Halitosis | 30,608         | 9,027            |

\*TH: healthy tongue coating sample;

TD: tongue coating sample with halitosis;

SH: healthy saliva sample;

SD: saliva sample with halitosis.

**Table S3  $\alpha$  diversity estimators of 38 samples**

| ID    | Observed OTUs | CatchAll | Chao1  |
|-------|---------------|----------|--------|
| TH*01 | 97            | 237.20   | 164.57 |
| TH02  | 98            | 225.10   | 138.55 |
| TH03  | 94            | 189.30   | 130.91 |
| TH04  | 120           | 219.70   | 188.44 |
| TH05  | 118           | 273.50   | 169.57 |
| TH06  | 110           | 311.60   | 169.67 |
| TH07  | 107           | 225.90   | 152.00 |
| TH08  | 66            | 151.00   | 89.00  |
| TH09  | 130           | 263.90   | 186.88 |
| TD*01 | 99            | 180.30   | 148.75 |
| TD02  | 105           | 238.70   | 164.91 |
| TD03  | 176           | 535.60   | 268.88 |
| TD04  | 181           | 384.20   | 241.64 |
| TD05  | 182           | 531.90   | 263.95 |
| TD06  | 96            | 218.60   | 129.83 |
| TD07  | 95            | 257.80   | 133.27 |
| TD08  | 135           | 392.10   | 224.00 |
| TD09  | 120           | 328.90   | 202.67 |
| TD10  | 142           | 280.00   | 190.32 |
| SH*01 | 152           | 244.70   | 188.00 |
| SH02  | 155           | 482.60   | 261.07 |
| SH03  | 170           | 369.00   | 223.25 |
| SH04  | 183           | 385.60   | 254.35 |
| SH05  | 166           | 340.10   | 199.56 |
| SH06  | 266           | 446.40   | 321.04 |
| SH07  | 249           | 424.20   | 292.24 |
| SH08  | 220           | 355.80   | 234.23 |
| SH09  | 238           | 375.00   | 276.04 |
| SD*01 | 162           | 349.80   | 211.71 |
| SD02  | 175           | 348.00   | 275.12 |
| SD03  | 196           | 328.20   | 240.00 |
| SD04  | 202           | 446.20   | 281.36 |
| SD05  | 151           | 253.10   | 188.09 |
| SD06  | 167           | 231.10   | 200.00 |
| SD07  | 183           | 549.20   | 229.50 |
| SD08  | 194           | 425.70   | 273.38 |
| SD09  | 201           | 393.30   | 244.64 |
| SD10  | 230           | 410.40   | 294.20 |

\*TH: healthy tongue coating sample;

TD: tongue coating sample with halitosis;

SH: healthy saliva sample;

SD: saliva sample with halitosis.

**Table S4-1 The characteristics of hub nodes in co-occurrence network (healthy module)**

| OTU ID | Taxa                              | Group | Colour of node | Average relative abundance (%) | Characteristics                                                | References* |
|--------|-----------------------------------|-------|----------------|--------------------------------|----------------------------------------------------------------|-------------|
| 327    | <i>Capnocytophaga_leadbetteri</i> | TH*   | Green          | 0.0047                         | associated with chorioamionitis                                | 1           |
| 70     | <i>Capnocytophaga_gingivalis</i>  | TH    | Green          | 0.043                          | cause bacteremia, pyogenic arthritis, lung abscess             | 2-4         |
| 166    | <i>Campylobacter_showae</i>       | SH*   | Orange         | 0.0573                         | cause bacteremia with cholangitis                              | 5           |
| 368    | <i>Campylobacter_gracilis</i>     | SH    | Orange         | 0.0032                         | participate in infections of endodontic origin                 | 6           |
| 839    | Bacteria                          | SH    | Orange         | 0.007                          | -                                                              | -           |
| 361    | Bacteria                          | SH    | Orange         | 0.0737                         | -                                                              | -           |
| 359    | Bacteria                          | SH    | Orange         | 0.1304                         | -                                                              | -           |
| 811    | <i>Actinomyces_dentalis</i>       | SH    | Orange         | 0.0051                         | isolated from pus of a human dental abscess                    | 7           |
| 285    | <i>Actinomyces</i>                | SH    | Orange         | 0.0832                         | cause human infection                                          | 8-10        |
| 191    | Unclassified                      | SH    | Orange         | 0.1119                         | -                                                              | -           |
| 158    | Unclassified                      | SH    | Orange         | 0.0702                         | -                                                              | -           |
| 336    | <i>TM7_genus_incertae_sedis</i>   | SH    | Orange         | 0.0611                         | -                                                              | -           |
| 61     | <i>Streptococcus_intermedius</i>  | SH    | Orange         | 0.0938                         | cause purulent infections                                      | 11-14       |
| 534    | <i>Selenomonas_noxia</i>          | SH    | Orange         | 0.0602                         | associated with periodontitis                                  | 15-17       |
| 507    | <i>Selenomonas_infelix</i>        | SH    | Orange         | 0.0227                         | cause bacteremia                                               | 18          |
| 159    | <i>Selenomonas_infelix</i>        | SH    | Orange         | 0.008                          | cause bacteremia                                               | 18          |
| 195    | <i>Prevotella_oris</i>            | SH    | Orange         | 0.0665                         | periodontopathogens, coaggregate with Porphyromonas gingivalis | 19          |
| 63     | <i>Leptotrichia</i>               | SH    | Orange         | 0.4138                         | cause human infection                                          | 20-22       |
| 287    | <i>Fusobacterium</i> sp.          | SH    | Orange         | 0.0491                         | production of volatile sulfur compounds, bacteremia            | 23,24       |
| 67     | <i>Fusobacterium</i>              | SH    | Orange         | 0.0449                         | cause human infection                                          | 25,26       |
| 367    | Flavobacteriaceae                 | SH    | Orange         | 0.0211                         | -                                                              | -           |
| 754    | <i>Cardiobacterium_valvarum</i>   | SH    | Orange         | 0.002                          | cause aortic vascular graft infection and Endocarditis         | 27,28       |
| 675    | <i>Cardiobacterium</i>            | SH    | Orange         | 0.0021                         | cause endocarditis                                             | 29          |
| 333    | Actinomycetales                   | SH    | Orange         | 0.0061                         | -                                                              | -           |
| 478    | <i>Prevotella_saccharolytica</i>  | SH    | Orange         | 0.0021                         | isolated from the human oral cavity                            | 30          |
| 494    | Flavobacteriaceae                 | SH    | Orange         | 0.0161                         | -                                                              | -           |
| 538    | <i>Treponema_maltophilum</i>      | SH    | Orange         | 0.0027                         | isolated from human periodontal lesions                        | 31          |

\*TH: healthy tongue coating sample;

SH: healthy saliva sample.

References please see Table S4-3

**Table S4-2 The characteristics of hub nodes in co-occurrence network (halitosis module)**

| OTU ID | Taxa                               | Group | Colour of node | relative abundance (%) | Characteristics                                                                                                                            | References* |
|--------|------------------------------------|-------|----------------|------------------------|--------------------------------------------------------------------------------------------------------------------------------------------|-------------|
| 408    | <i>Fusobacterium</i> sp.           | TD*   | Green          | 0.002                  | produce volatile sulfur compounds, cause bacteremia                                                                                        | 23,24       |
| 395    | <i>Corynebacterium matruchotii</i> | TD    | Green          | 0.0166                 | prevalent in infected root canals, significantly decreased as caries progressed, had higher abundance in subgingival microbiome of smokers | 32-34       |
| 393    | <i>Capnocytophaga ochracea</i>     | TD    | Green          | 0.0148                 | cause severe sepsis, conjunctivitis, cervical abscess                                                                                      | 35-37       |
| 147    | <i>Capnocytophaga ochracea</i>     | TD    | Green          | 0.004                  | cause severe sepsis, conjunctivitis, cervical abscess                                                                                      | 35-37       |
| 48     | <i>Capnocytophaga</i>              | TD    | Green          | 0.0235                 | cause local bone infection, bacteremia                                                                                                     | 38,39       |
| 334    | <i>Campylobacter gracilis</i>      | TD    | Green          | 0.009                  | participate in infections of endodontic origin                                                                                             | 6           |
| 359    | Bacteria                           | TD    | Green          | 0.013                  | -                                                                                                                                          | -           |
| 64     | Actinomycetales                    | TD    | Green          | 0.0031                 | -                                                                                                                                          | -           |
| 479    | <i>Actinomyces massiliensis</i>    | TD    | Green          | 0.0031                 | isolated from a human blood sample                                                                                                         | 40          |
| 132    | <i>Actinomyces graevenitzii</i>    | TD    | Green          | 0.1223                 | associated with lung abscess, bacteremia                                                                                                   | 41,42       |
| 232    | <i>Actinomyces graevenitzii</i>    | TD    | Green          | 0.0258                 | associated with lung abscess, bacteremia                                                                                                   | 41,42       |
| 287    | <i>Fusobacterium</i> sp.           | TD    | Green          | 0.0104                 | production of volatile sulfur compounds, bacteremia                                                                                        | 23,24       |
| 499    | <i>Actinomyces</i> sp.             | TD    | Green          | 0.004                  | cause human infection                                                                                                                      | 8-10        |
| 218    | <i>Actinomyces</i> sp.             | TD    | Green          | 0.0051                 | cause human infection                                                                                                                      | 8-10        |
| 16     | <i>Actinomyces</i> sp.             | TD    | Green          | 1.535                  | cause human infection                                                                                                                      | 8-10        |
| 191    | Unclassified                       | TD    | Green          | 0.0727                 | -                                                                                                                                          | -           |
| 158    | Unclassified                       | TD    | Green          | 0.0303                 | -                                                                                                                                          | -           |
| 406    | <i>Selenomonas noxia</i>           | TD    | Green          | 0.0121                 | associated with periodontitis                                                                                                              | 15-17       |
| 397    | <i>Prevotella micans</i>           | TD    | Green          | 0.002                  | isolated from human oral cavity                                                                                                            | 43          |
| 31     | <i>Prevotella histicola</i>        | TD    | Green          | 2.1943                 | isolated from human oral cavity                                                                                                            | 44          |
| 105    | <i>Leptotrichia hofstadii</i>      | TD    | Green          | 0.0752                 | isolated from healthy human saliva                                                                                                         | 45          |
| 201    | <i>Leptotrichia</i> sp.            | TD    | Green          | 0.0423                 | cause human infection                                                                                                                      | 20-22       |
| 1      | <i>Neisseria flavescens</i>        | TD    | Green          | 28.9305                | cause meningitis, septicaemia, infective endocarditis, pneumonia                                                                           | 46-49       |
| 123    | <i>Prevotella</i> sp.              | SD*   | Orange         | 0.3928                 | cause human infection                                                                                                                      | 50          |
| 6      | <i>Granulicatella adiacens</i>     | SD    | Orange         | 2.3351                 | cause septic arthritis, endocarditis                                                                                                       | 51,52       |
| 9      | <i>Gemella sanguinis</i>           | SD    | Orange         | 1.2647                 | cause endocarditis, prosthetic joint infection, prosthetic valve endocarditis                                                              | 53-55       |
| 232    | <i>Actinomyces graevenitzii</i>    | SD    | Orange         | 0.0399                 | associated with lung abscess, bacteremia                                                                                                   | 41,42       |

\*TD: tongue coating sample with halitosis;

SD: saliva sample with halitosis.

References please see Table S4-3



### Table S4-3 References

- 1 Mekouar, H. *et al.* Capnocytophaga species and perinatal infections: case report and review of the literature. *Acta clinica Belgica* **67**, 42-45, doi:10.1179/ACB.67.1.2062626 (2012).
- 2 Fukuoka, K. *et al.* [A case report of lung abscess caused by Capnocytophaga gingivalis infection]. *Kansenshogaku zasshi. The Journal of the Japanese Association for Infectious Diseases* **74**, 594-597 (2000).
- 3 Mantadakis, E., Danilatou, V., Christidou, A., Stiakaki, E. & Kalmanti, M. Capnocytophaga gingivalis bacteremia detected only on quantitative blood cultures in a child with leukemia. *The Pediatric infectious disease journal* **22**, 202-204 (2003).
- 4 Rodgers, G. L., Mortensen, J. E. & Goldsmith, D. P. Pyogenic arthritis caused by capnocytophaga gingivalis in an immunocompetent three-year-old male. *Journal of clinical rheumatology : practical reports on rheumatic & musculoskeletal diseases* **7**, 265-267 (2001).
- 5 Suzuki, J. *et al.* Campylobacter showae bacteremia with cholangitis. *Journal of infection and chemotherapy : official journal of the Japan Society of Chemotherapy* **19**, 960-963, doi:10.1007/s10156-012-0524-2 (2013).
- 6 Siqueira, J. F., Jr. & Rocas, I. N. Campylobacter gracilis and Campylobacter rectus in primary endodontic infections. *International endodontic journal* **36**, 174-180 (2003).
- 7 Hall, V., Collins, M. D., Lawson, P. A., Falsen, E. & Duerden, B. I. Actinomyces dentalis sp. nov., from a human dental abscess. *International journal of systematic and evolutionary microbiology* **55**, 427-431, doi:10.1099/ijs.0.63376-0 (2005).
- 8 Govindarajah, N., Hameed, W., Middleton, S. & Booth, M. Actinomyces infection causing acute right iliac fossa pain. *BMJ case reports* **2014**, doi:10.1136/bcr-2014-204559 (2014).
- 9 Masata, J., Dunder, P. & Martan, A. Actinomyces infection appearing five years after trocar-guided transvaginal mesh prolapse repair. *International urogynecology journal* **25**, 993-996, doi:10.1007/s00192-013-2304-7 (2014).
- 10 Pakish, J. B. & West, L. Actinomyces bacteremia in association with tubo-ovarian abscesses and hysteroscopic sterilization. *Obstetrics and gynecology* **124**, 451-453, doi:10.1097/AOG.0000000000000382 (2014).
- 11 Livingston, L. V. & Perez-Colon, E. Streptococcus intermedius Bacteremia and Liver Abscess following a Routine Dental Cleaning. *Case reports in infectious diseases* **2014**, 954046, doi:10.1155/2014/954046 (2014).
- 12 Mishra, A. K. & Fournier, P. E. The role of Streptococcus intermedius in brain abscess. *European journal of clinical microbiology & infectious diseases : official publication of the European Society of Clinical Microbiology* **32**, 477-483, doi:10.1007/s10096-012-1782-8 (2013).
- 13 Presnell, L., Maeda, K., Griffin, M. & Axelrod, D. A child with purulent pericarditis and Streptococcus intermedius in the presence of a pericardial teratoma: an unusual presentation. *The Journal of thoracic and cardiovascular surgery* **147**, e23-24, doi:10.1016/j.jtcvs.2013.11.025 (2014).
- 14 Trabue, C., Pearman, R. & Doering, T. Pyogenic brain and lung abscesses due to Streptococcus intermedius. *Journal of general internal medicine* **29**, 407, doi:10.1007/s11606-013-2565-3 (2014).
- 15 Colombo, A. P. *et al.* Comparisons of subgingival microbial profiles of refractory periodontitis, severe periodontitis, and periodontal health using the human oral microbe identification microarray. *Journal of periodontology* **80**, 1421-1432,

doi:10.1902/jop.2009.090185 (2009).

16 Favari, M. *et al.* Microbiological diversity of generalized aggressive periodontitis by 16S rRNA clonal analysis. *Oral microbiology and immunology* **23**, 112-118, doi:10.1111/j.1399-302X.2007.00397.x (2008).

17 Lopez, R., Dahlen, G., Retamales, C. & Baelum, V. Clustering of subgingival microbial species in adolescents with periodontitis. *European journal of oral sciences* **119**, 141-150, doi:10.1111/j.1600-0722.2011.00808.x (2011).

18 Bisiaux-Salauze, B., Perez, C., Sebald, M. & Petit, J. C. Bacteremias caused by *Selenomonas artemidis* and *Selenomonas infelix*. *Journal of clinical microbiology* **28**, 140-142 (1990).

19 Sato, T. & Nakazawa, F. Coaggregation between *Prevotella oris* and *Porphyromonas gingivalis*. *Journal of microbiology, immunology, and infection = Wei mian yu gan ran za zhi* **47**, 182-186, doi:10.1016/j.jmii.2012.09.005 (2014).

20 Cooreman, S. *et al.* Bacteraemia caused by *Leptotrichia trevisanii* in a neutropenic patient. *Anaerobe* **17**, 1-3, doi:10.1016/j.anaerobe.2010.12.002 (2011).

21 Couturier, M. R., Slechta, E. S., Goulston, C., Fisher, M. A. & Hanson, K. E. *Leptotrichia* bacteremia in patients receiving high-dose chemotherapy. *Journal of clinical microbiology* **50**, 1228-1232, doi:10.1128/JCM.05926-11 (2012).

22 Eribe, E. R. & Olsen, I. *Leptotrichia* species in human infections. *Anaerobe* **14**, 131-137, doi:10.1016/j.anaerobe.2008.04.004 (2008).

23 Claesson, R., Edlund, M. B., Persson, S. & Carlsson, J. Production of volatile sulfur compounds by various *Fusobacterium* species. *Oral microbiology and immunology* **5**, 137-142 (1990).

24 O'Grady, L. R. & Ralph, E. D. Anaerobic meningitis and bacteremia caused by *Fusobacterium* species. *American journal of diseases of children* **130**, 871-873 (1976).

25 Buelow, B. D., Lambert, J. M. & Gill, R. M. *Fusobacterium* liver abscess. *Case reports in gastroenterology* **7**, 482-486, doi:10.1159/000356821 (2013).

26 Pett, E., Saeed, K. & Dryden, M. *Fusobacterium* species infections: clinical spectrum and outcomes at a district general hospital. *Infection* **42**, 363-370, doi:10.1007/s15010-013-0564-2 (2014).

27 Bothelo, E. *et al.* Endocarditis caused by *Cardiobacterium valvarum*. *Journal of clinical microbiology* **44**, 657-658, doi:10.1128/JCM.44.2.657-658.2006 (2006).

28 Hagiya, H. *et al.* Aortic vascular graft infection caused by *Cardiobacterium valvarum*: a case report. *Journal of infection and chemotherapy : official journal of the Japan Society of Chemotherapy* **20**, 804-809, doi:10.1016/j.jiac.2014.07.008 (2014).

29 Walkty, A. *Cardiobacterium hominis* endocarditis: A case report and review of the literature. *The Canadian journal of infectious diseases & medical microbiology = Journal canadien des maladies infectieuses et de la microbiologie medicale / AMMI Canada* **16**, 293-297 (2005).

30 Downes, J., Tanner, A. C., Dewhirst, F. E. & Wade, W. G. *Prevotella saccharolytica* sp. nov., isolated from the human oral cavity. *International journal of systematic and evolutionary microbiology* **60**, 2458-2461, doi:10.1099/ijs.0.014720-0 (2010).

31 Wyss, C., Choi, B. K., Schupbach, P., Guggenheim, B. & Gobel, U. B. *Treponema maltophilum* sp. nov., a small oral spirochete isolated from human periodontal lesions. *International journal of systematic bacteriology* **46**, 745-752 (1996).

- 32 Gross, E. L. *et al.* Bacterial 16S sequence analysis of severe caries in young permanent teeth. *Journal of clinical microbiology* **48**, 4121-4128, doi:10.1128/JCM.01232-10 (2010).
- 33 Moon, J. H., Lee, J. H. & Lee, J. Y. Subgingival microbiome in smokers and non-smokers in Korean chronic periodontitis patients. *Molecular oral microbiology*, doi:10.1111/omi.12086 (2014).
- 34 Siqueira, J. F., Jr., Rocas, I. N., Souto, R., de Uzeda, M. & Colombo, A. P. Checkerboard DNA-DNA hybridization analysis of endodontic infections. *Oral surgery, oral medicine, oral pathology, oral radiology, and endodontics* **89**, 744-748 (2000).
- 35 Desai, S. S., Harrison, R. A. & Murphy, M. D. Capnocytophaga ochracea causing severe sepsis and purpura fulminans in an immunocompetent patient. *The Journal of infection* **54**, e107-109, doi:10.1016/j.jinf.2006.06.014 (2007).
- 36 Henzen, C. & Streit, E. [Cervical abscess caused by Capnocytophaga ochracea]. *Schweizerische medizinische Wochenschrift* **123**, 1165-1168 (1993).
- 37 Wasserman, D., Asbell, P. A., Friedman, A. J. & Bottone, E. J. Capnocytophaga ochracea chronic blepharoconjunctivitis. *Cornea* **14**, 533-535 (1995).
- 38 Piau, C., Arvieux, C., Bonnaure-Mallet, M. & Jolivet-Gougeon, A. Capnocytophaga spp. involvement in bone infections: a review. *Int J Antimicrob Agents* **41**, 509-515, doi:10.1016/j.ijantimicag.2013.03.001 (2013).
- 39 Pokroy-Shapira, E., Shiber, S. & Molad, Y. Capnocytophaga bacteraemia following rituximab treatment. *BMJ case reports* **2012**, doi:10.1136/bcr-2012-006224 (2012).
- 40 Renvoise, A., Raoult, D. & Roux, V. Actinomyces massiliensis sp. nov., isolated from a patient blood culture. *International journal of systematic and evolutionary microbiology* **59**, 540-544, doi:10.1099/ijs.0.001503-0 (2009).
- 41 Hwang, S. S. *et al.* Actinomyces graevenitzii bacteremia in a patient with alcoholic liver cirrhosis. *Anaerobe* **17**, 87-89, doi:10.1016/j.anaerobe.2011.03.002 (2011).
- 42 Nagaoka, K. *et al.* Multiple lung abscesses caused by Actinomyces graevenitzii mimicking acute pulmonary coccidioidomycosis. *Journal of clinical microbiology* **50**, 3125-3128, doi:10.1128/JCM.00761-12 (2012).
- 43 Downes, J., Liu, M., Kononen, E. & Wade, W. G. Prevotella micans sp. nov., isolated from the human oral cavity. *International journal of systematic and evolutionary microbiology* **59**, 771-774, doi:10.1099/ijs.0.002337-0 (2009).
- 44 Downes, J., Hooper, S. J., Wilson, M. J. & Wade, W. G. Prevotella histicola sp. nov., isolated from the human oral cavity. *International journal of systematic and evolutionary microbiology* **58**, 1788-1791, doi:10.1099/ijs.0.65656-0 (2008).
- 45 Eribe, E. R. *et al.* Genetic diversity of Leptotrichia and description of Leptotrichia goodfellowii sp. nov., Leptotrichia hofstadii sp. nov., Leptotrichia shahii sp. nov. and Leptotrichia wadei sp. nov. *International journal of systematic and evolutionary microbiology* **54**, 583-592 (2004).
- 46 Huang, L. *et al.* Necrotizing pneumonia and empyema caused by Neisseria flavescens infection. *Journal of thoracic disease* **6**, 553-557, doi:10.3978/j.issn.2072-1439.2014.02.16 (2014).
- 47 Prentice, A. W. Neisseria flavescens as a cause of meningitis. *Lancet* **272**, 613-614 (1957).
- 48 Sinave, C. P. & Ratzan, K. R. Infective endocarditis caused by Neisseria flavescens. *The American journal of medicine* **82**, 163-164 (1987).

- 49 Wertlake, P. T. & Williams, T. W., Jr. Septicaemia caused by *Neisseria flavescens*. *Journal of clinical pathology* **21**, 437-439 (1968).
- 50 Amisah-Arthur, K. N., Farooq, T. A., Dhillon, N., Cunliffe, I. A. & Bansal, A. Rare case of post-cataract-surgery *Prevotella* endophthalmitis diagnosed by polymerase chain reaction DNA sequencing. *Journal of cataract and refractive surgery* **39**, 463-466, doi:10.1016/j.jcrs.2012.12.021 (2013).
- 51 Hepburn, M. J., Fraser, S. L., Rennie, T. A., Singleton, C. M. & Delgado, B., Jr. Septic arthritis caused by *Granulicatella adiacens*: diagnosis by inoculation of synovial fluid into blood culture bottles. *Rheumatology international* **23**, 255-257, doi:10.1007/s00296-003-0305-4 (2003).
- 52 Perkins, A. *et al.* A case of endocarditis due to *Granulicatella adiacens*. *Clinical microbiology and infection : the official publication of the European Society of Clinical Microbiology and Infectious Diseases* **9**, 576-577 (2003).
- 53 Gundre, P., Pascal, W., Abrol, S., Kupfer, Y. & Tessler, S. Prosthetic valve endocarditis caused by *Gemella sanguinis*: a consequence of persistent dental infection. *The American journal of the medical sciences* **341**, 512-513, doi:10.1097/MAJ.0b013e31821389f0 (2011).
- 54 Leung, D. T., Davis, E. M., Qian, Q. & Gold, H. S. First report of prosthetic joint infection by *Gemella sanguinis* and associated "pseudosatelliting" phenomenon on culture. *Journal of clinical microbiology* **49**, 3395-3397, doi:10.1128/JCM.01050-11 (2011).
- 55 Yang, C. H. & Tsai, K. T. *Gemella sanguinis* endocarditis: first case report in Taiwan and review of the literature. *Journal of the Formosan Medical Association = Taiwan yi zhi* **113**, 562-565, doi:10.1016/j.jfma.2012.02.012 (2014).
-

**Table S5 Statistics of metagenomic sequencing of samples**

| Sample | Clean PE-reads | Human PE-reads | Microbial PE-reads | Human DNA contamination |
|--------|----------------|----------------|--------------------|-------------------------|
| TH*    | 22,882,448     | 2,068,573      | 20,813,875         | 9.04%                   |
| TD*    | 23,364,951     | 668,237        | 22,696,714         | 2.86%                   |
| SH*    | 31,314,275     | 20,942,987     | 10,371,288         | 66.88%                  |
| SD*    | 23,349,421     | 12,174,388     | 11,175,033         | 52.14%                  |

\*TH: healthy tongue coating sample;

TD: tongue coating sample with halitosis;

SH: healthy saliva sample;

SD: saliva sample with halitosis;

**Table S6 Gene count of samples**

| Sample_id | Gene count |
|-----------|------------|
| TH*       | 436,024    |
| TD*       | 448,263    |
| SH*       | 445,829    |
| SD*       | 478,922    |
| TC*       | 507,406    |
| SA*       | 530,824    |
| Total     | 585,327    |

\*TH: healthy tongue coating sample;

TD: tongue coating sample with halitosis;

SH: healthy saliva sample;

SD: saliva sample with halitosis;

TC: tongue coating samples;

SA: saliva samples.

Table S7-1 Enrichment analysis of KEGG ontology (enrichment analysis of level 2)

| Level 1                              | Level 2                                     | Total<br>(296279) | Gene_TH*<br>n<br>umber (7497) | Gene_TD*<br>n<br>umber (8532) | Gene_SH*<br>n<br>umber<br>(3825) | Gene_SD*<br>n<br>umber<br>(10515) | Total_per<br>cent | Gene_TH<br>percent | Gene_TD<br>percent | Gene_SH<br>percent | Gene_SD<br>percent | Gene_TH<br>pvalue | Gene_TH<br>qvalue | Gene_TD<br>pvalue | Gene_TD<br>qvalue | Gene_SH<br>pvalue | Gene_SH<br>qvalue | Gene_SD<br>pvalue | Gene_SD<br>qvalue |
|--------------------------------------|---------------------------------------------|-------------------|-------------------------------|-------------------------------|----------------------------------|-----------------------------------|-------------------|--------------------|--------------------|--------------------|--------------------|-------------------|-------------------|-------------------|-------------------|-------------------|-------------------|-------------------|-------------------|
| Cellular Processes                   | Cell growth and death                       | 5328              | 146                           | 162                           | 67                               | 222                               | 0.017983          | 0.019474           | 0.018987           | 0.017516           | 0.021113           | 0.173893          | 0.674617          | 0.250168          | 0.912403          | 0.603362          | 1                 | 0.088861          | 0.092229          |
| Cellular Processes                   | Cell motility                               | 361               | 13                            | 9                             | 5                                | 13                                | 0.002128          | 0.001734           | 0.001055           | 0.001307           | 0.001236           | 0.131313          | 0.554432          | 0.713715          | 1                 | 0.498948          | 1                 | 0.517771          | 1                 |
| Cellular Processes                   | Cellular community                          | 13                | 1                             | 1                             | 0                                | 1                                 | 4.39E-05          | 0.000133           | 0.000117           | 0                  | 9.51E-05           | 0.283366          | 0.936341          | 0.316048          | 0.980393          | 1                 | 1                 | 0.374853          | 1                 |
| Cellular Processes                   | Transport and catabolism                    | 3358              | 82                            | 120                           | 53                               | 89                                | 0.011334          | 0.010938           | 0.014065           | 0.013856           | 0.008464           | 0.643871          | 1                 | 0.010723          | 0.093588          | 0.082936          | 0.38201           | 0.998628          | 1                 |
| Environmental Information Processing | Membrane transport                          | 28505             | 901                           | 784                           | 403                              | 1008                              | 0.09621           | 0.120181           | 0.091889           | 0.105559           | 0.095863           | 2.94E-12          | 2.23E-10          | 0.918721          | 1                 | 0.029663          | 0.173416          | 0.553912          | 1                 |
| Environmental Information Processing | Signal transduction                         | 13104             | 327                           | 329                           | 149                              | 412                               | 0.044229          | 0.043617           | 0.038561           | 0.038954           | 0.039182           | 0.010872          | 1                 | 0.999069          | 1                 | 0.951299          | 1                 | 0.995705          | 1                 |
| Environmental Information Processing | Signaling molecules and interaction         | 10                | 1                             | 0                             | 1                                | 1                                 | 3.38E-05          | 0.000133           | 0.000117           | 0                  | 9.51E-05           | 0.226089          | 0.85914           | 0.253384          | 0.912403          | 1                 | 1                 | 0.303271          | 0.960651          |
| Genetic Information Processing       | Folding, sorting and degradation            | 18273             | 413                           | 534                           | 171                              | 678                               | 0.061675          | 0.055089           | 0.062588           | 0.044706           | 0.064479           | 0.993057          | 1                 | 0.367516          | 1                 | 0.999998          | 1                 | 0.116197          | 0.504629          |
| Genetic Information Processing       | Replication and repair                      | 27677             | 822                           | 882                           | 442                              | 1211                              | 0.093415          | 0.109644           | 0.103376           | 0.115556           | 0.115169           | 9.62E-07          | 3.65E-05          | 0.000825          | 0.015678          | 2.48E-06          | 7.55E-05          | 2.1E-14           | 3.19E-12          |
| Genetic Information Processing       | Transcription                               | 4767              | 74                            | 93                            | 29                               | 142                               | 0.016099          | 0.009871           | 0.0109             | 0.007582           | 0.013505           | 0.999999          | 1                 | 0.999982          | 1                 | 0.999999          | 1                 | 0.987232          | 1                 |
| Genetic Information Processing       | Translation                                 | 29386             | 538                           | 712                           | 260                              | 1033                              | 0.099184          | 0.071762           | 0.083451           | 0.067974           | 0.098241           | 1                 | 1                 | 1                 | 1                 | 1                 | 1                 | 0.633956          | 1                 |
| Human Diseases                       | Cancers: Overview                           | 4045              | 122                           | 148                           | 65                               | 159                               | 0.013653          | 0.016273           | 0.017346           | 0.016993           | 0.015121           | 0.029282          | 0.173416          | 0.002274          | 0.032925          | 0.046149          | 0.250523          | 0.101854          | 0.455348          |
| Human Diseases                       | Cancers: Specific types                     | 794               | 14                            | 28                            | 10                               | 22                                | 0.00268           | 0.001867           | 0.002382           | 0.002614           | 0.002092           | 0.988918          | 1                 | 0.161722          | 0.648887          | 0.379203          | 1                 | 0.964225          | 1                 |
| Human Diseases                       | Drug resistance                             | 4123              | 137                           | 130                           | 47                               | 177                               | 0.013916          | 0.018274           | 0.015237           | 0.012288           | 0.016833           | 0.001013          | 0.017102          | 0.156257          | 0.641922          | 0.824468          | 1                 | 0.006331          | 0.074025          |
| Human Diseases                       | Endocrine and metabolic diseases            | 2097              | 32                            | 49                            | 17                               | 78                                | 0.007078          | 0.002468           | 0.005743           | 0.004444           | 0.007418           | 0.999373          | 1                 | 0.944138          | 1                 | 0.985263          | 1                 | 0.351939          | 1                 |
| Human Diseases                       | Immune diseases                             | 674               | 12                            | 27                            | 11                               | 14                                | 0.002275          | 0.001601           | 0.003165           | 0.002876           | 0.001331           | 0.920178          | 1                 | 0.050465          | 0.276862          | 0.258114          | 0.912403          | 0.989664          | 1                 |
| Human Diseases                       | Infectious diseases: Bacterial              | 6615              | 142                           | 220                           | 62                               | 260                               | 0.022327          | 0.018941           | 0.025785           | 0.016209           | 0.024727           | 0.981739          | 1                 | 0.017053          | 0.1296            | 0.997016          | 1                 | 0.049913          | 0.261615          |
| Human Diseases                       | Infectious diseases: Parasitic              | 283               | 7                             | 8                             | 5                                | 5                                 | 0.000955          | 0.000934           | 0.000938           | 0.001307           | 0.000476           | 0.576238          | 1                 | 0.570097          | 1                 | 0.303363          | 0.960651          | 0.973575          | 1                 |
| Human Diseases                       | Neurodegenerative diseases                  | 1465              | 40                            | 33                            | 21                               | 31                                | 0.004945          | 0.005335           | 0.003868           | 0.00549            | 0.002948           | 0.3347            | 0.997536          | 0.939903          | 1                 | 0.344493          | 1                 | 0.999454          | 1                 |
| Metabolism                           | Amino acid metabolism                       | 52036             | 1332                          | 1573                          | 739                              | 1700                              | 0.175632          | 0.177671           | 0.184365           | 0.193203           | 0.161674           | 0.323777          | 0.984283          | 0.016731          | 0.1296            | 0.002383          | 0.032925          | 0.999948          | 1                 |
| Metabolism                           | Biosynthesis of other secondary metabolites | 4839              | 114                           | 166                           | 59                               | 161                               | 0.016333          | 0.015206           | 0.019456           | 0.015425           | 0.015311           | 0.794233          | 1                 | 0.013331          | 0.112576          | 0.689884          | 1                 | 0.809971          | 1                 |
| Metabolism                           | Carbohydrate metabolism                     | 60295             | 1380                          | 1721                          | 705                              | 1933                              | 0.203508          | 0.184074           | 0.201711           | 0.184314           | 0.183833           | 0.999991          | 1                 | 0.666313          | 1                 | 0.998737          | 1                 | 1                 | 1                 |
| Metabolism                           | Energy metabolism                           | 38117             | 720                           | 947                           | 394                              | 1254                              | 0.128652          | 0.096038           | 0.110994           | 0.103007           | 0.119258           | 1                 | 1                 | 1                 | 1                 | 1                 | 1                 | 0.998518          | 1                 |
| Metabolism                           | Global and overview maps                    | 63754             | 1489                          | 1819                          | 823                              | 2009                              | 0.215182          | 0.198613           | 0.213197           | 0.215163           | 0.19106            | 0.999829          | 1                 | 0.678751          | 1                 | 0.507581          | 1                 | 1                 | 1                 |
| Metabolism                           | Glycan biosynthesis and metabolism          | 14328             | 407                           | 452                           | 186                              | 631                               | 0.048356          | 0.054288           | 0.052977           | 0.048627           | 0.06601            | 0.009102          | 0.092229          | 0.024355          | 0.160958          | 0.479728          | 1                 | 2.31E-08          | 1.17E-06          |
| Metabolism                           | Lipid metabolism                            | 32248             | 332                           | 419                           | 190                              | 413                               | 0.044715          | 0.044284           | 0.049109           | 0.049673           | 0.039277           | 0.800454          | 1                 | 0.02585           | 0.163719          | 0.074652          | 0.354597          | 0.997591          | 1                 |
| Metabolism                           | Biosynthesis of cofactors and vitamins      | 33194             | 952                           | 1029                          | 514                              | 1197                              | 0.112036          | 0.126984           | 0.120605           | 0.134379           | 0.113837           | 2.37E-05          | 0.000514          | 0.006093          | 0.074025          | 9.56E-06          | 0.000242          | 0.279952          | 0.936341          |
| Metabolism                           | Metabolism of other amino acids             | 16250             | 390                           | 470                           | 240                              | 563                               | 0.054847          | 0.052021           | 0.055087           | 0.062745           | 0.053453           | 0.867829          | 1                 | 0.467605          | 1                 | 0.01832           | 0.132605          | 0.731145          | 1                 |
| Metabolism                           | Metabolism of terpenoids and polyketides    | 9210              | 228                           | 303                           | 120                              | 363                               | 0.031086          | 0.030412           | 0.035513           | 0.031373           | 0.034522           | 0.642579          | 1                 | 0.010178          | 0.093588          | 0.471983          | 1                 | 0.022003          | 0.152022          |
| Metabolism                           | Nucleotide metabolism                       | 41170             | 999                           | 1134                          | 509                              | 1397                              | 0.138957          | 0.133253           | 0.132911           | 0.133072           | 0.132858           | 0.928877          | 1                 | 0.951585          | 1                 | 0.860734          | 1                 | 0.968798          | 1                 |
| Metabolism                           | Xenobiotics biodegradation and metabolism   | 4840              | 105                           | 129                           | 54                               | 167                               | 0.016356          | 0.014006           | 0.01512            | 0.014118           | 0.015882           | 0.954037          | 1                 | 0.826765          | 1                 | 0.877253          | 1                 | 0.656612          | 1                 |
| Organismal Systems                   | Circulatory system                          | 218               | 5                             | 5                             | 3                                | 1                                 | 0.000736          | 0.000667           | 0.000586           | 0.000784           | 9.51E-05           | 0.64811           | 1                 | 0.754549          | 1                 | 0.535301          | 1                 | 0.999622          | 1                 |
| Organismal Systems                   | Digestive system                            | 618               | 11                            | 11                            | 5                                | 25                                | 0.002086          | 0.001467           | 0.001289           | 0.001307           | 0.002378           | 0.912403          | 1                 | 0.968406          | 1                 | 0.900856          | 1                 | 0.280362          | 0.936341          |
| Organismal Systems                   | Endocrine system                            | 4382              | 83                            | 127                           | 55                               | 95                                | 0.014779          | 0.011071           | 0.014885           | 0.014379           | 0.009035           | 0.997892          | 1                 | 0.483191          | 1                 | 0.602424          | 1                 | 1                 | 1                 |
| Organismal Systems                   | Environmental adaptation                    | 697               | 11                            | 22                            | 3                                | 17                                | 0.002353          | 0.001467           | 0.002579           | 0.000784           | 0.001617           | 0.965577          | 1                 | 0.361111          | 1                 | 0.994024          | 1                 | 0.960778          | 1                 |
| Organismal Systems                   | Excretory system                            | 559               | 3                             | 10                            | 8                                | 7                                 | 0.001887          | 0.0004             | 0.001172           | 0.002092           | 0.000666           | 0.999928          | 1                 | 0.960952          | 1                 | 0.433785          | 1                 | 0.999763          | 1                 |
| Organismal Systems                   | Immune system                               | 158               | 1                             | 9                             | 2                                | 10                                | 0.000533          | 0.000133           | 0.001055           | 0.000523           | 0.000951           | 0.982587          | 1                 | 0.040166          | 0.226119          | 0.606525          | 1                 | 0.056112          | 0.276862          |
| Organismal Systems                   | Nervous system                              | 1473              | 21                            | 40                            | 12                               | 37                                | 0.004972          | 0.002801           | 0.004688           | 0.003137           | 0.003519           | 0.998717          | 1                 | 0.668699          | 1                 | 0.966756          | 1                 | 0.990048          | 1                 |

\*TH: healthy tongue coating sample;  
 TD: tongue coating sample with halitosis;  
 SH: healthy saliva sample;  
 SD: saliva sample with halitosis.



**Table S8-1 Functional gene abundances in hydrogen sulfide metabolic process in tongue coating samples**

| KO number | Gene name | Gene description                                                            | Gene_TH*_abundance | Gene_TD*_abundance | Ratio(Gene_TD_abundance/<br>Gene_TH_abundance) | ↑/↓/-(<br>cutoff=2) |
|-----------|-----------|-----------------------------------------------------------------------------|--------------------|--------------------|------------------------------------------------|---------------------|
| K00955    | cysNC     | bifunctional enzyme CysN/CysC [EC:2.7.7.4 2.7.1.25];                        | 1.03282E-05        | 1.3838E-05         | 1.3                                            | -                   |
| K00956    | cysN      | sulfate adenylyltransferase subunit 1 [EC:2.7.7.4];                         | 0.000217222        | 0.000215965        | 1.0                                            | -                   |
| K00957    | cysD      | sulfate adenylyltransferase subunit 2 [EC:2.7.7.4];                         | 0.000132342        | 0.000117335        | 0.9                                            | -                   |
| K00860    | cysC      | adenylylsulfate kinase [EC:2.7.1.25];                                       | 9.38931E-08        | 2.06995E-06        | 22.0                                           | ↑                   |
| K00394    | aprA      | adenylylsulfate reductase, subunit A [EC:1.8.99.2];                         | 4.13129E-06        | 7.66647E-07        | 0.2                                            | ↓                   |
| K00390    | cysH      | phosphoadenosine phosphosulfate reductase [EC:1.8.4.8];                     | 0.000124596        | 0.00011538         | 0.9                                            | -                   |
| K00380    | cysJ      | sulfite reductase (NADPH) flavoprotein alpha-component [EC:1.8.1.2];        | 0.000261868        | 0.000295504        | 1.1                                            | -                   |
| K00381    | cysI      | sulfite reductase (NADPH) hemoprotein beta-component [EC:1.8.1.2];          | 0.000262478        | 0.000251077        | 1.0                                            | -                   |
| K00392    | sir       | sulfite reductase (ferredoxin) [EC:1.8.7.1]                                 | 5.63358E-07        | 5.36653E-07        | 1.0                                            | -                   |
| K00640    | cysE      | serine O-acetyltransferase [EC:2.3.1.30];                                   | 0.000388107        | 0.000351585        | 0.9                                            | -                   |
| K01738    | cysK      | cysteine synthase A [EC:2.5.1.47];                                          | 0.00037177         | 0.000296578        | 0.8                                            | -                   |
| K12339    | cysM      | cysteine synthase B [EC:2.5.1.47];                                          | 1.87786E-07        | 7.66647E-08        | 0.4                                            | ↓                   |
| K01739    | metB      | cystathionine gamma-synthase [EC:2.5.1.48];                                 | 0.00030196         | 0.000241877        | 0.8                                            | -                   |
| K17217    | mccB      | cystathionine gamma-lyase / homocysteine desulfhydrase [EC:4.4.1.1 4.4.1.2] | 0                  | 0                  | NaN                                            | -                   |
| K01697    | cbs       | cystathionine beta-synthase [EC:4.2.1.22];                                  | 0                  | 7.66647E-08        | NaN                                            | ↑                   |
| K01760    | metC      | cystathionine beta-lyase [EC:4.4.1.8];                                      | 0.000292571        | 0.000223823        | 0.8                                            | -                   |
| K14155    | patB      | cystathionine beta-lyase [EC:4.4.1.8]                                       | 0.000289989        | 0.000197718        | 0.7                                            | -                   |
| K00812    | aspB      | aspartate aminotransferase [EC:2.6.1.1];                                    | 0.000104691        | 7.01866E-05        | 0.7                                            | -                   |
| K00813    | aspC      | aspartate aminotransferase [EC:2.6.1.1];                                    | 0.000189617        | 0.000174451        | 0.9                                            | -                   |
| K11358    | yhdR      | aspartate aminotransferase [EC:2.6.1.1];                                    | 2.74168E-05        | 5.45853E-05        | 2.0                                            | ↑                   |
| K01011    | sseA      | thiosulfate/3-mercaptopyruvate sulfurtransferase [EC:2.8.1.1 2.8.1.2];      | 2.52103E-05        | 1.65979E-05        | 0.7                                            | -                   |
| K02439    | glpE      | thiosulfate sulfurtransferase [EC:2.8.1.1]                                  | 2.53511E-06        | 1.53329E-06        | 0.6                                            | -                   |

\*TH: healthy tongue coating sample;

TD: tongue coating sample with halitosis.



**Table S8-2 Functional gene abundances in hydrogen sulfide metabolic process in saliva samples**

| KO number | Gene name | Gene description                                                            | Gene_SH*_abundance | Gene_SD*_abundance | Ratio(gene_SD_abundance/gene_SH_abundance) | ↑ / ↓ / -<br>(cutoff=2) |
|-----------|-----------|-----------------------------------------------------------------------------|--------------------|--------------------|--------------------------------------------|-------------------------|
| K00955    | cysNC     | bifunctional enzyme CysN/CysC [EC:2.7.7.4 2.7.1.25];                        | 5.97456E-06        | 8.06678E-06        | 1.4                                        | -                       |
| K00956    | cysN      | sulfate adenyltransferase subunit 1 [EC:2.7.7.4];                           | 0.000212223        | 0.000151112        | 0.7                                        | -                       |
| K00957    | cysD      | sulfate adenyltransferase subunit 2 [EC:2.7.7.4];                           | 0.000142043        | 9.42456E-05        | 0.7                                        | -                       |
| K00860    | cysC      | adenylsulfate kinase [EC:2.7.1.25];                                         | 5.04892E-07        | 7.98691E-07        | 1.6                                        | -                       |
| K00394    | aprA      | adenylsulfate reductase, subunit A [EC:1.8.99.2];                           | 6.73189E-07        | 1.43764E-06        | 2.1                                        | ↑                       |
| K00390    | cysH      | phosphoadenosine phosphosulfate reductase [EC:1.8.4.8];                     | 0.000118229        | 6.99654E-05        | 0.6                                        | -                       |
| K00380    | cysJ      | sulfite reductase (NADPH) flavoprotein alpha-component [EC:1.8.1.2];        | 0.000284591        | 0.000201829        | 0.7                                        | -                       |
| K00381    | cysI      | sulfite reductase (NADPH) hemoprotein beta-component [EC:1.8.1.2];          | 0.000241086        | 0.000200312        | 0.8                                        | -                       |
| K00392    | sir       | sulfite reductase (ferredoxin) [EC:1.8.7.1]                                 | 1.77554E-05        | 8.30639E-06        | 0.5                                        | ↓                       |
| K00640    | cysE      | serine O-acetyltransferase [EC:2.3.1.30];                                   | 0.000374714        | 0.000343917        | 0.9                                        | -                       |
| K01738    | cysK      | cysteine synthase A [EC:2.5.1.47];                                          | 0.00029553         | 0.000337607        | 1.1                                        | -                       |
| K12339    | cysM      | cysteine synthase B [EC:2.5.1.47];                                          | 6.73189E-07        | 3.19477E-07        | 0.5                                        | ↓                       |
| K01739    | metB      | cystathionine gamma-synthase [EC:2.5.1.48];                                 | 0.000295025        | 0.000289446        | 1.0                                        | -                       |
| K17217    | mccB      | cystathionine gamma-lyase / homocysteine desulfhydrase [EC:4.4.1.1 4.4.1.2] | 5.04892E-07        | 3.19477E-07        | 0.6                                        | -                       |
| K01697    | cbs       | cystathionine beta-synthase [EC:4.2.1.22];                                  | 0                  | 0                  | NaN                                        | -                       |
| K01760    | metC      | cystathionine beta-lyase [EC:4.4.1.8];                                      | 0.000318755        | 0.000279143        | 0.9                                        | -                       |
| K14155    | patB      | cystathionine beta-lyase [EC:4.4.1.8]                                       | 0.000141538        | 0.000193842        | 1.4                                        | -                       |
| K00812    | aspB      | aspartate aminotransferase [EC:2.6.1.1];                                    | 4.1906E-05         | 8.60191E-05        | 2.1                                        | ↑                       |
| K00813    | aspC      | aspartate aminotransferase [EC:2.6.1.1];                                    | 0.000192616        | 0.000153349        | 0.8                                        | -                       |
| K11358    | yhDR      | aspartate aminotransferase [EC:2.6.1.1];                                    | 2.52446E-05        | 4.4567E-05         | 1.8                                        | -                       |
| K01011    | sseA      | thiosulfate/3-mercaptopyruvate sulfurtransferase [EC:2.8.1.1 2.8.1.2];      | 7.82583E-06        | 2.63568E-05        | 3.4                                        | ↑                       |
| K02439    | glpE      | thiosulfate sulfurtransferase [EC:2.8.1.1]                                  | 8.41487E-07        | 2.87529E-06        | 3.4                                        | ↑                       |

\*SH: healthy saliva sample;

SD: saliva sample with halitosis.

**Table S9 Bacterial candidates contributed to hydrogen sulphide-related functional variations**

| Gene name               | Gene description                                 | Taxonomic origin               |
|-------------------------|--------------------------------------------------|--------------------------------|
| cysM                    | cysteine synthase B                              | Acinetobacter calcoaceticus    |
|                         |                                                  | Burkholderia pseudomallei      |
|                         |                                                  | Cronobacter sakazakii          |
|                         |                                                  | Enterobacter aerogenes         |
|                         |                                                  | Escherichia coli               |
|                         |                                                  | Pseudomonas putida             |
|                         |                                                  | Pseudomonas syringae           |
|                         |                                                  | Shigella flexneri              |
|                         |                                                  | Yersinia enterocolitica        |
| cbs                     | cystathionine beta-synthase                      | Lactobacillus plantarum        |
| apsB                    | aspartate aminotransferase                       | Enterococcus faecalis          |
|                         |                                                  | Enterococcus faecium           |
|                         |                                                  | Peptoclostridium difficile     |
|                         |                                                  | Pseudomonas syringae           |
|                         |                                                  | Streptococcus mutans           |
|                         |                                                  | Streptococcus pneumoniae       |
|                         |                                                  | Streptococcus sanguinis        |
| yhdR                    | aspartate aminotransferase                       | Bacillus subtilis              |
| sseA                    | thiosulfate/3-mercaptopyruvate sulfurtransferase | Clostridium botulinum          |
|                         |                                                  | Cronobacter sakazakii          |
|                         |                                                  | Enterobacter aerogenes         |
|                         |                                                  | Escherichia coli               |
|                         |                                                  | Mesorhizobium loti             |
|                         |                                                  | Methylobacterium radiotolerans |
|                         |                                                  | Morganella morganii            |
|                         |                                                  | Mycobacterium leprae           |
|                         |                                                  | Ochrobactrum anthropi          |
|                         |                                                  | Peptoclostridium difficile     |
|                         |                                                  | Proteus mirabilis              |
| glpE                    | thiosulfate sulfurtransferase                    | Acinetobacter calcoaceticus    |
|                         |                                                  | Cronobacter sakazakii          |
|                         |                                                  | Enterobacter aerogenes         |
|                         |                                                  | Escherichia coli               |
|                         |                                                  | Haemophilus influenzae         |
|                         |                                                  | Morganella morganii            |
|                         |                                                  | Proteus mirabilis              |
|                         |                                                  | Pseudomonas putida             |
|                         |                                                  | Pseudomonas syringae           |
|                         |                                                  | Shigella flexneri              |
|                         |                                                  | Vibrio parahaemolyticus        |
| Yersinia enterocolitica |                                                  |                                |
| cysC                    | adenylylsulfate kinase                           | Escherichia coli               |
|                         |                                                  | Lactobacillus plantarum        |
|                         |                                                  | Pseudomonas syringae           |
|                         |                                                  | Shigella flexneri              |
|                         |                                                  | Yersinia enterocolitica        |

Oral species (Human Oral Microbiome Database)

Other human microbiota (not oral)
